## Comparative analysis of single-cell RNA-sequencing methods

*Christoph Ziegenhain<sup>1</sup>, Swati Parekh<sup>1</sup>, Beate Vieth<sup>1</sup>, Martha Smets<sup>2</sup>, Heinrich Leonhardt<sup>2</sup>, Ines Hellmann<sup>1</sup> and Wolfgang Enard<sup>1\*</sup>*

<sup>1</sup> *Anthropology & Human Genomics, Department of Biology II, Ludwig-Maximilians University, Großhaderner Str. 2, 82152 Martinsried, Germany.*

<sup>2</sup> *Human Biology & Bioimaging, Department of Biology II, Ludwig-Maximilians University, Großhaderner Str. 2, 82152 Martinsried, Germany.*

### **\* Corresponding author**

Wolfgang Enard

Anthropology and Human Genetics

Department of Biology II

Ludwig-Maximilians University

Großhaderner Str. 2

82152 Martinsried, Germany

Phone: +49 (0)89 / 2180 - 74 339

Fax: +49 (0)89 / 2180 - 74 331

E-Mail: [enard@bio.lmu.de](mailto:enard@bio.lmu.de)

## 1 **Abstract**

2 **Single-cell mRNA sequencing (scRNA-seq) allows to profile heterogeneous cell**  
3 **populations, offering exciting possibilities to tackle a variety of biological and medical**  
4 **questions. A range of methods has been recently developed, making it necessary to**  
5 **systematically compare their sensitivity, accuracy, precision and cost-efficiency.**  
6 **Here, we have generated and analyzed scRNA-seq data from 479 mouse ES cells and**  
7 **spike-in controls that were prepared with four different methods in two independent**  
8 **replicates each. We compare their sensitivity by the number of detected genes and by**  
9 **the efficiency with which they capture spiked-in mRNAs, their accuracy by correlating**  
10 **spiked-in mRNA concentrations with estimated expression levels, their precision by**  
11 **power simulations and variance decomposition and their efficiency by their costs to**  
12 **reach a given amount of power. While accuracy is similar for all methods, we find that**  
13 **Smart-seq on a microfluidic platform is the most sensitive method, CEL-seq is the**  
14 **most precise method and SCRB-seq and Drop-seq are the most efficient methods.**  
15 **Our analysis provides a solid basis to choose among four available scRNA-seq**  
16 **methods and to benchmark future method development.**

17

18

## 19 **Introduction**

20 Genome-wide quantification of mRNA transcripts is a highly informative phenotype to  
21 characterize cellular states and understand regulatory circuits<sup>1,2</sup>. Ideally, this is collected  
22 with high temporal and spatial resolution and RNA-sequencing of single cells (scRNA-seq)  
23 is starting to reveal new biological and medical insights<sup>3-5</sup>. scRNA-seq requires to isolate  
24 intact single cells and turn their mRNA into cDNA libraries that can be quantified using high-  
25 throughput sequencing<sup>4,6</sup>. The sensitivity, accuracy, precision and throughput of this  
26 process determines how well single cell transcriptomes can be characterized. In order to  
27 choose among available scRNA-seq methods, it is important to estimate these parameters  
28 comparatively. It has previously been shown that scRNA-seq performed in the small  
29 volumes available via the automated microfluidic platform from Fluidigm (Smart-seq  
30 protocol on the C1-platform) performs better than Smart-seq or other commercially  
31 available kits in microliter volumes<sup>7</sup>. More recent scRNA-seq protocols have used unique  
32 molecular identifiers (UMIs) that tag mRNA molecules with a random barcode sequence  
33 during reverse transcription in order to identify sequence reads that originated during  
34 amplification<sup>8-10</sup>. This leads to a better quantification of mRNA molecules<sup>11,12</sup>. Another  
35 decisive recent development has been to add a barcode for each single cell during reverse

36 transcription allowing to process hundreds or thousands of scRNA-seq libraries in one  
37 reaction, increasing the throughput of scRNA-seq library generation by one to three orders  
38 of magnitude<sup>9,13-15</sup>. However, a systematic comparison of sensitivity, accuracy and precision  
39 among such recently developed methods has not been performed yet. To this end, we have  
40 generated and analysed 479 scRNA-seq libraries from mouse embryonic stem (mES) cells  
41 cultured in two-inhibitor (2i/LIF) medium using four different methods run in two replicates  
42 each (Fig. 1).

43

## 44 **Results**

### 45 **Generation and processing of 479 scRNA-seq libraries**

46 We have used the Smart-seq protocol on the C1 platform from Fluidigm (Smart-seq/C1)  
47 that uses microfluidic chips to automatically separate up to 96 cells<sup>7</sup>. After lysis and the  
48 addition of artificial mRNAs of known concentrations (ERCCs<sup>16</sup>), cDNA is generated by  
49 oligo-dT priming, template switching and PCR amplification. These can then be turned into  
50 scRNA-seq libraries using 96 Nextera reactions. Advantages of this system are that the  
51 process of single cell isolation is automated, that captured cells can be imaged, that  
52 reaction volumes are small and that the protocol generates full length cDNAs.  
53 Disadvantages include that the protocol does not use UMIs and is expensive due to the use  
54 of the Smart-seq kit, the microfluidic chip and the separate Nextera reactions.

55 For the second approach we isolated single cells in a 96-well plate by sorting them into  
56 lysis buffer and used the SCR-seq protocol to generate scRNA-seq libraries<sup>13</sup>. In this  
57 protocol, cDNA from cells and ERCCs is generated by oligo-dT priming, template switching  
58 and PCR amplification, similar to Smart-seq/C1. However, the oligo-dT primers contain  
59 well-specific barcodes and UMIs and the resulting cDNA is turned into scRNA-seq using a  
60 modified transposon-based fragmentation approach that enriches for 3' ends. The protocol  
61 is optimized for small volumes and few handling steps, but it does not generate full length  
62 cDNA profiles and its performance compared to the smaller reaction volumes in the C1 is  
63 unclear.

64 The third method we tested is Drop-seq, a recently developed microdroplet-based  
65 approach<sup>15</sup>. Similarly to SCR-seq, each cDNA molecule is decorated with a cell-specific  
66 multiplexing barcode and a UMI to count abundance. In the case of Drop-seq, these  
67 barcoded oligo-dT primers are immobilized on beads and encapsulated with single-cells in  
68 nanoliter-sized emulsion droplets. In Drop-seq, simultaneous inclusion of ERCC spike-ins  
69 in the library preparation is not possible, as it would have to be included in the bead  
70 suspension. However, most beads will not carry a cell transcriptome, as cell concentration

71 has to be relatively low to avoid doublets. To address the issue of lacking ERCCs in our  
72 data, we used a published dataset<sup>15</sup>, where ERCC spike-ins were sequenced by the Drop-  
73 seq method without single-cell transcriptomes. Finally, we used data<sup>12</sup> generated using  
74 CEL-seq<sup>9</sup> for which also two different batches of scRNA-seq libraries were generated from  
75 the same cell type and culture conditions. Similarly to Drop-seq and SCR-seq, cDNA is  
76 tagged with multiplexing barcodes and UMIs. As opposed to the three PCR-based  
77 methods described before, CEL-seq relies on linear amplification by in-vitro transcription  
78 (IVT) for the initial pre-amplification of single-cell material. An overview of the methods and  
79 their features is given in Supplementary Table 1.

80 For Smart-seq/C1, SCR-seq and Drop-seq we generated 437, 253 and 432 million reads  
81 from 192, 192 and ~200 cells in the two independent replicates. Data from CEL-seq  
82 consisted of 51 million reads from a total of 74 cells (Fig. 1). After demultiplexing and  
83 assignment of cell barcodes, we could map >50% of all reads to the mouse genome and  
84 30-40% of all reads to exons (Fig. 2a), comparable to previous results<sup>7,14</sup>. As expected, the  
85 3' counting methods showed a strong 3' bias while Smart-seq/C1 showed a moderate 3'  
86 bias (Supplementary Fig. 1a). We used the Drop-seq pipeline<sup>15</sup> to quantify UMIs and found  
87 that between 2.6% (Drop-seq, replicate B) and 59.5% (SCR-seq, replicate A) of all exon  
88 reads were unique, i.e. that the scRNA-seq libraries had been sequenced on average 1.7-  
89 to 38-fold over (Fig. 2a). We filtered the scRNA-seq libraries for possible cell doublets either  
90 by their microscope images (Smart-seq/C1) or by discarding transcriptomes with more than  
91 twice the mean total UMI content. Furthermore, we disregarded scRNA-seq libraries with  
92 less than 100,000 reads mapped to exons, resulting in 479 single cell transcriptomes  
93 across the four methods (Fig. 1). As expected, these transcriptomes cluster according to  
94 method in a principal component analysis, whereas the biggest difference is between the 3'  
95 counting methods and Smart-seq/C1 (Supplementary Fig. 1b). In summary, we obtained  
96 high-quality scRNA-seq data for 479 cells distributed equally across methods and  
97 replicates, allowing to compare the four different scRNA-seq methods with respect to their  
98 sensitivity, accuracy and precision.

99

#### 100 **SCR-seq and Smart-seq/C1 show the highest sensitivity**

101 As a relative measure of sensitivity we compared the number of detected genes per method  
102 and replicate (Fig. 2b). Clearly, Drop-seq had the lowest sensitivity with a median of 3158  
103 genes per cell, CEL-seq had 6384 and SCR-seq and Smart-seq/C1 were very similar with  
104 a median of ~8800 genes detected per cell (Fig. 2b). This relative ranking remains  
105 unchanged if one subsamples 100.000 reads for each cell, but CEL-seq performs then

106 almost as good as SCRBS-seq and Smart-seq/C1 (Supplementary Fig. 2a). While the  
107 number of detected genes per cell differs, the total number of detectable genes in all cell  
108 converges probably around 20,000 of the 39,000 annotated mouse genes for all 3' counting  
109 methods. In contrast, the Smart-seq/C1 method converges at more than 25,000 detected  
110 genes (Fig. 2c). Furthermore, while the majority of genes is detected by all four methods,  
111 Smart-seq/C1 detects 3974 genes not seen by the 3' counting methods (Supplementary  
112 Fig. 2b,c). This pattern remains when subsampling 50 cells à 100,000 reads per method  
113 (data not shown).

114 As an absolute measure of sensitivity, we compared the probabilities of detecting the 92  
115 artificially spiked-in mRNAs (ERCCs) since their concentration per cell is known. We  
116 recorded the number of cells with an expression value of zero for each ERCC per method  
117 and applied a maximum likelihood method<sup>17</sup> to estimate the probability of successful  
118 detection of an ERCC mRNA with a given number of molecules per cell as a binomial  
119 process (Fig. 2d). This is more informative than non-zero detections of ERCC, as in that  
120 case it is only known that some copies were successfully captured but not how many  
121 exactly. Additionally, this method is also superior to other approaches as it does not try to  
122 relate the expression level to the capture efficiency. For Smart-seq/C1, a gene is detected  
123 in half of the cells when it has a concentration of ~8 molecules per cell. Drop-seq and  
124 SCRBS-seq show similar estimates of 11 molecules per cell. However, CEL-seq needs 92  
125 molecules to reach the 50% detection probability (Supplementary Fig. 2d). Similar  
126 estimates of 16, 17, 18 and 93 molecules per cell for Smart-seq/C1, SCRBS-seq, Drop-Seq  
127 and CEL-seq are made when subsampling 10,000 ERCC reads for 50 cells per method. The  
128 drastically lower sensitivity of CEL-seq when using ERCCs contradicts the just slightly  
129 lower sensitivity when considering the number of detected genes. This discrepancy was  
130 also noted in the original CEL-seq publication and explained with a potential degradation of  
131 the ERCCs<sup>12</sup>. Hence, the ERCC reads in this CEL-seq data set might underestimate the  
132 sensitivity of this method considerably. The other discrepancy between the two sensitivity  
133 estimates is seen for Drop-seq. While it detects less than half the number of genes than  
134 Smart-seq/C1 and SCRBS-seq, it shows a similar sensitivity for the ERCCs. However, it is  
135 important to realize that ERCCs can not be spiked in when using the Drop-seq approach,  
136 but have to be run separately from the cells<sup>15</sup>. It is unclear to what extent the lower  
137 complexity in an "ERCC-only" run might lead to higher sensitivities and/or to what extent  
138 this reflects a difference between data generated by Macosko et al and data generated by  
139 us. For now, we conservatively assume that our data is representative and hence that Drop-  
140 seq is less than half as sensitive as the other methods.

141 In summary, we find that Smart-seq/C1 is the most sensitive method as it detects at least  
142 as many genes per cell as CEL-seq and SCRIB-seq and detects in total ~ 4000 genes that  
143 are not detected by the 3' counting methods.

144

#### 145 **Accuracy is similar between Drop-seq, SCRIB-seq and Smart-seq/C1**

146 In order to quantify the accuracy of transcript level quantifications, we compared observed  
147 expression values with annotated molecule concentration of the 92 ERCC transcripts (Fig  
148 3a). For each cell, we calculated the correlation coefficient ( $R^2$ ) for a linear model fit (Fig 3b).  
149 Clearly, CEL-seq performed worst in this measure, while Drop-Seq, SCRIB-seq and Smart-  
150 seq/C1 showed largely similar accuracy. This pattern remained with downsampled ERCC  
151 data (data not shown). As discussed above, this low performance of CEL-seq could be  
152 consistently explained with a potential degradation of the ERCCs. A previous study using  
153 CEL-seq from 10 pg of total RNA input and ERCC spike-in reported a mean correlation  
154 coefficient of  $R^2=0.87^9$ , similar to the ones reported for the other three methods. Assuming  
155 that this is representative for CEL-seq, we find that the accuracy is similarly high across the  
156 four methods.

157

#### 158 **Precision is highest for CEL-seq and strongly increased by UMIs**

159 While a high accuracy is necessary to quantify absolute expression values, one most often  
160 analyses relative differences among cells or samples in order to identify differentially  
161 expressed genes or biological variation. Hence, the precision of the method, i.e. its  
162 reproducibility or amount of technical variation matters more.

163 We use the probabilistic model proposed by Kim et al<sup>18</sup> that estimates the proportion of  
164 technical variation from ERCCs. Since we use the same cells under the same culture  
165 conditions we assume that the remaining fraction of biological variation is the same across  
166 the data sets. We find that Smart-seq/C1 has the lowest proportion of technical variation,  
167 which is surprising given that it is the only method that lacks UMIs that are expected to  
168 increase the precision. Indeed, the total amount of variation is higher for Smart-seq/C1 than  
169 for the other three methods (Supplementary Figure 3a) suggesting that the technical  
170 variation is underestimated for Smart-seq/C1. Indeed, when we repeat the analysis without  
171 considering the UMI information, Drop-seq and SCRIB-seq have now more total variation  
172 (Supplementary Fig. 3a) and less technical variation (Fig. 4a). Interestingly, the technical  
173 variation of CEL-seq remains almost unaffected and is the lowest among the four methods  
174 when considering the effect of UMIs (Fig. 4a). This pattern remains when filtering out lowly  
175 expressed genes and ERCCs (data not shown). When using another variance

176 decomposition method<sup>19</sup>, we do not observe the difference between using and not using  
177 UMIs, probably due to filtering of genes whose variance composition can not be reliably  
178 estimated. Although this filtering makes it difficult to compare the fraction of technical  
179 variation, it is worth mentioning that CEL-seq has again the lowest amount of technical  
180 variation (Supplementary Fig. 3b). Hence, when using variance decomposition methods  
181 CEL-seq shows the highest precision. Maybe even more important, our analysis shows that  
182 some variance decomposition method can severely underestimate the technical variation  
183 from ERCCs for PCR-based amplification protocols.

184 In order to investigate precision in scRNA-seq methods independent of spike-in transcripts,  
185 we used power simulation. Based on the method by Wu et al<sup>20</sup>, we used the mean-  
186 dispersion distributions of the data (Supplementary Fig. 4) to simulate the power and the  
187 false discovery rate for differential gene expression by DESeq2<sup>21</sup>. While the three UMI-  
188 based methods all had false discovery rates (FDRs) close to the expected 5%, Smart-  
189 seq/C1 resulted in progressive FDRs considerably above 5% (Fig. 4b). Furthermore, CEL-  
190 seq needed just 52 cells per group to detect small expression differences with 80% power,  
191 followed by SCR-seq (112) and Drop-seq (170), while Smart-seq/C1 reached 80% power  
192 only for highly expressed genes (Fig. 4b and Supplementary Fig. 5a). Accordingly, when  
193 simulating the power to detect larger expression differences ( $\log_2$  fold-change of 0.5-3) with  
194 a fixed sample size of 16 cells per group, CEL-seq performed best (Supplementary Fig. 6b),  
195 followed by SCR-seq and Drop-seq, while Smart-seq/C1 had the lowest power. Notably,  
196 when analysing power without using UMIs, SCR-seq and CEL-seq perform similar to  
197 Smart-seq/C1, while Drop-seq performs very poorly (Supplementary Fig. 5b). Hence, UMIs  
198 strongly increase the power to detect differentially expressed genes by scRNA-seq,  
199 especially for methods that use PCR amplification.

200 In summary, when using power simulations to compare precision among methods, CEL-  
201 seq performs best, followed by SCR-seq and Drop-seq. Smart-seq/C1 performs worst,  
202 probably because it does not include UMIs.

203

204 **Efficiency is highest for SCR-seq and Drop-seq when considering costs and power**

205

206 Practically, the costs of a method also matter when judging the performance of different  
207 scRNA-seq methodologies. Here, we estimate the cost-efficiency by calculating the costs  
208 for generating scRNA-seq data at a given amount of power. Given the number of single  
209 cells that are needed per group to reach 80% power (50% for Smart-seq/C1) as simulated  
210 above (Figure 4b), we calculate the costs to generate these libraries and to sequence

211 enough to obtain 100,000 exon-mapped reads (Figure 2). For example, SCRIB-seq requires  
212 112 cells per group and generating 224 SCRIB-seq libraries costs ~450€. To generate  
213 100,000 reads mapping to exons for 224 SCRIB-seq libraries requires ~64 million paired-  
214 end reads generated with a 50 cycles single end kit that we assume cost 320€. When we  
215 do analogous calculations for the three other methods (Table 1), we find that Drop-Seq and  
216 SCRIB-seq are equally cost-effective, closely followed by CEL-seq, while Smart-Seq/C1 is  
217 almost ten-fold less efficient due its high library costs that arise from the microfluidic chips  
218 and the costs for generating independent libraries. The estimate should be understood as a  
219 lower boundary for the real costs since many factors are not considered such as costs to  
220 set-up the methods, costs to isolate single cells, costs due to unequal pooling of libraries or  
221 costs due to practical constraints in generating a fixed number of scRNA-seq libraries and  
222 reads. Furthermore, power for differential gene expression is not the only factor that  
223 matters and in addition to the metrics investigated above, methods differ with respect to full  
224 length coverage of cDNAs (only possible for Smart-seq/C1), possibility of imaging cells  
225 (CEL-seq and Smart-seq/C1) and the possibility to have ERCCs for each library (not  
226 possible for Drop-seq).

227 Nevertheless, we think that our estimates allow a fair and transparent comparison of the  
228 four methods and reveal that Drop-Seq and SCRIB-seq are most efficient and Smart-  
229 seq/C1 is almost ten-fold less cost-efficient.

230

231

## 232 **Discussion**

233 Single-cell RNA-sequencing (scRNA-seq) is a powerful technology to tackle biomedical  
234 questions. To facilitate choosing among the many approaches that were recently  
235 developed, we systematically compared four scRNA-seq methods and assessed their  
236 sensitivity, accuracy, precision and cost-efficiency. We chose a leading commercial  
237 platform (Smart-seq/C1), a method that uses in-vitro transcription for amplification from  
238 manually isolated cells (CEL-seq), a PCR-based method with a very high throughput (Drop-  
239 seq) and a PCR-based method that allows single cell isolation by FACS (SCRIB-seq). All  
240 these methods can be set up by a molecular biology lab, as has been done by us for  
241 Smart-seq/C1, SCRIB-seq and Drop-seq.

242 We find that SCRIB-seq, Smart-seq and CEL-seq detect a similar number of genes per cell  
243 while Drop-seq - at least in our hands - detects over 50% less than the other methods (Fig.  
244 2b and Supplementary Figure 2a). Whereas we detect 3,158 genes per ES cell, 5,663 genes  
245 per 3T3 cell are found in the original Drop-seq publication<sup>15</sup>. It is currently unclear whether



246 this discrepancy is due to biological or technical reasons. Importantly, Drop-seq does not  
247 detect generally fewer genes since the total number of detected genes converges around  
248 20,000, similar as for SCR-seq and CEL-seq (Fig. 2c). While these three 3' counting  
249 methods detect largely the same genes, Smart-seq/C1 detects almost 4000 additional  
250 genes (Supplementary Fig. 2b). So while ERCCs are measured with similar high accuracy  
251 by all four methods (Fig. 3), a considerable number of genes are missed by the 3' counting  
252 methods. Hence, Smart-seq/C1 is the most sensitive method because it detects  
253 considerably more genes in addition to its full length coverage of transcripts  
254 (Supplementary Fig. 1a). However, it is difficult to gauge how much information this adds  
255 for finding and defining cell types and characterizing their biological states and networks.  
256 Probably more important than the sensitivity and accuracy for the performance of scRNA-  
257 seq methods is their precision, i.e. their reproducibility of measuring gene expression levels.  
258 We find that variance decomposition methods that use ERCCs to estimate precision can  
259 severely underestimate the technical variance when PCR is used to amplify cDNA without  
260 UMIs (Fig. 4a). Further work will be needed to investigate whether more ERCCs, other  
261 ERCCs and/or different estimation methods could solve this. Assuming that variance  
262 decomposition can accurately estimate precision when using UMIs, we find that CEL-seq  
263 performs better than the PCR-based Drop-seq and SCR-seq. When using power  
264 simulations that use the entire data, we also find that CEL-seq is more precise since it  
265 detects differentially expressed genes with fewer cells (Fig. 4b). These simulations also  
266 show that UMIs increase the power considerably, especially for the PCR-based methods  
267 (Supplementary Figure 5b). Hence, in-vitro transcription (IVT)-based amplification is more  
268 precise than PCR-based amplification and - in contrast to bulk RNA-seq libraries<sup>22</sup> - UMIs  
269 decisively increase the power for differential gene expression from single cell RNA-seq  
270 libraries. However, the higher precision of CEL-seq comes with higher costs per library and  
271 in its current form also requires manual isolation of single cells (Table S1). Indeed, when we  
272 calculate the costs to reach a given power for differential gene expression, Drop-Seq and  
273 SCR-seq are both more efficient than CEL-seq (Table 1). Smart-seq/C1 is by far the least  
274 efficient method due to its high costs and low precision. The efficiency could be improved  
275 for all methods, e.g. when implementing UMI-based protocols on the C1 platform<sup>11</sup>, or  
276 using early barcoding to increase the number of cells per chip. The CEL-seq variant MARS-  
277 seq combines the higher precision of IVT-based amplification with higher throughput<sup>14</sup> and  
278 SCR-seq is even more cost-efficient on a 384-well format<sup>13</sup>.

279

280 In summary, we find that Drop-seq is probably the most efficient method when analysing  
281 large numbers of cells and SCRIB-seq might be preferable for analyzing smaller numbers,  
282 especially when considering that ERCCs can be spiked in, cells can be preselected by  
283 FACS and the same set-up can also be used for bulk RNA-seq.

## 284 **Methods**

### 285 **Published data**

286 CEL-seq data for J1 mESC cultured in 2i/LIF condition<sup>12</sup> were obtained under accession  
287 GSE54695. Drop-seq ERCC<sup>15</sup> data were obtained under accession GSE66694. Raw fastq  
288 files were extracted using the SRA toolkit (2.3.5).

289 We trimmed cDNA reads to the same length and processed raw reads in the same way as  
290 data sequenced for this study (see below).

291

### 292 **Cell culture of mESC**

293 J1 mouse embryonic stem cells were maintained on gelatin-coated dishes in Dulbecco's  
294 modified Eagle's medium supplemented with 16% fetal bovine serum (FBS, Sigma-Aldrich),  
295 0.1 mM  $\beta$ -mercaptoethanol (Invitrogen), 2 mM L-glutamine, 1x MEM non-essential amino  
296 acids, 100 U/ml penicillin, 100  $\mu$ g/ml streptomycin (PAA Laboratories GmbH), 1000 U/ml  
297 recombinant mouse LIF (Millipore) and 2i (1 $\mu$ M PD032591 and 3 $\mu$ M CHIR99021 (Axon  
298 Medchem, Netherlands). J1 embryonic stem cells were obtained from E. Li and T. Chen and  
299 mycoplasma free determined by a PCR-based test. Cell line authentication was not recently  
300 performed.

301

### 302 **Single cell RNA-seq library preparations**

#### 303 *Drop-seq*

304 Drop-seq experiments were performed as published<sup>15</sup> and successful establishment of the  
305 method in our lab was confirmed by a species-mixing experiment (data not shown). For this  
306 work, J1 mES cells (100/ $\mu$ l) and barcode-beads (120/ $\mu$ l, Chemgenes) were co-flow in  
307 Drop-seq PDMS devices (Nanoshift). Emulsions were broken by addition of perfluorooctanol  
308 (Sigma-Aldrich) and mRNA on beads reverse transcribed. Unused primers were degraded  
309 by addition of Exonuclease I (New England Biolabs). Washed beads were counted and  
310 aliquoted for pre-amplification (2000 beads / reaction). Nextera XT libraries were  
311 constructed from 1 ng of pre-amplified cDNA with a custom P5 primer (IDT).

312

#### 313 *SCRB-seq*

314 RNA was stabilized by resuspending cells in RNAProtect Cell Reagent (Qiagen) and RNase  
315 inhibitors (Promega). Prior to FACS sorting, cells were diluted in PBS (Invitrogen). Single  
316 cells were sorted into 5  $\mu$ l lysis buffer consisting of a 1/500 dilution of Phusion HF buffer  
317 (New England Biolabs), spun down and frozen at -80 °C. Plates were thawed and libraries  
318 prepared as described previously<sup>13</sup>. Briefly, RNA was desiccated after protein digestion by

319 Proteinase K (Ambion). RNA was reverse transcribed using barcoded oligo-dT primers (IDT)  
320 and products pooled and concentrated. Unincorporated barcode primers were digested  
321 using Exonuclease I (New England Biolabs). Pre-amplification of cDNA pools were done  
322 with the KAPA HiFi HotStart polymerase (KAPA Biosystems). Nextera XT libraries were  
323 constructed from 1 ng of pre-amplified cDNA with a custom P5 primer (IDT).

324

#### 325 *Smart-seq/C1*

326 Smart-seq/C1 libraries were prepared on the Fluidigm C1 system according to the  
327 manufacturer's protocol. Cells were loaded on a 10-17  $\mu\text{m}$  RNA-seq microfluidic IFC at a  
328 concentration of 200,000/ml. Capture site occupancy was surveyed using the Operetta  
329 (Perkin Elmer) automated imaging platform.

330

#### 331 **DNA sequencing**

332 For each scRNA-seq method, final library pools were size-selected on 2% E-Gel Agarose  
333 EX Gels (Invitrogen) by excising a range of 300-800 bp and extracting DNA using the  
334 MinElute Kit (Qiagen) according to the manufacturer's protocol.

335 0.1 pmol of library pools were sequenced on a Illumina HiSeq1500 using High Output  
336 mode. Smart-seq/C1 libraries were sequenced 45 cycles single-end, whereas Drop-seq  
337 and SCRB-seq libraries were sequenced paired-end with 20 cycles to decode cell  
338 barcodes and UMI from read 1 and 45 cycles into the cDNA fragment.

339

#### 340 **Basic data processing and sequence alignment**

341 Smart-seq/C1 libraries (i5 and i7) and Drop-seq/SCRB-seq pools (i7) were demultiplexed  
342 from the Nextera barcodes. All reads were mapped to the mouse genome (mm10) including  
343 mitochondrial genome sequences and unassigned scaffolds concatenated with the ERCC  
344 spike-in reference. Alignments were calculated using STAR 2.4.0<sup>23</sup> using all default  
345 parameters.

346 For libraries containing UMIs, cell- and gene-wise count/UMI tables were generated using  
347 the published Drop-seq pipeline<sup>15</sup>. We discarded the last 2 bases of the Drop-seq cell and  
348 molecular barcodes to account for bead synthesis errors.

349 For Smart-seq/C1, features were assigned and counted using the Rsubread package<sup>24</sup>.

## 350 **Power Analysis**

351 We utilized the R package PROPER<sup>20</sup> for statistical power evaluation. For each method, we  
352 estimated mean baseline expression and dispersions using DESeq2<sup>21</sup> and all genes with  
353  $\log_2(\text{dispersion}) > -10$  were considered for simulation. For each method, 100 RNA-seq  
354 experiments were simulated with 5 percent differentially expressed genes between two  
355 groups of sample size of  $2^4$ ,  $2^5$ ,  $2^6$ ,  $2^7$ ,  $2^8$  and  $2^9$  cells.

356

## 357 **ERCC capture efficiency**

358 To estimate the single molecule capture efficiency, we assume that the success or failure of  
359 detecting an ERCC is a binomial process, as described before<sup>17</sup>. Detections are  
360 independent from each other and are thus regarded as independent Bernoulli trials. We  
361 recorded the number of cells with nonzero and zero expression values for each ERCC per  
362 method and applied a maximum likelihood estimation to fit the probability of successful  
363 detection. The fit line was shaded with the 95% Wilson score confidence interval.

364

## 365 **Variance decomposition**

366 Variance decomposition was done as implemented by Kim et al<sup>18</sup>. We estimate the variation  
367 in capture efficiency ( $\theta$ ) and in sequencing efficiency ( $\gamma$ ) separately for each replicate to  
368 account for batch effects. We integrated the published Drop-seq ERCC data by scaling it  
369 with size factors from our mESC data to make up 10% of counts in one cell.

370 We applied scLVM as described previously<sup>19</sup>, both using the log-linear fit of mean and  
371 variance relationship as well as the ERCCs for estimation of technical variation.

372

## 373 **Cost efficiency calculation**

374 We based our cost efficiency extrapolation on the power simulations performed in this  
375 study (Fig. 4b). We determined the number of cells required per group for adequate power  
376 (80% in UMI-based methods and 50% for Smart-seq/C1) by an asymptotic fit to the  
377 median powers. Next, we determined the number of raw reads required to reach 100,000  
378 exonic reads per cell. For this, we used the mean exon assignment rate from Fig. 2a (CEL-  
379 seq: 36%, Drop-seq: 40%, SCR-seq: 44%, Smart-seq/C1: 44%). To account for reads  
380 that do not belong to desired cell-transcriptomes in early-barcoding methods, we assumed  
381 a loss of reads of 20% (CEL-seq), 50% (Drop-seq) and 20% (SCR-seq). For the  
382 calculation of sequencing cost, we assumed 5€ per million raw reads, independent of  
383 method. Although UMI-based methods need paired-end sequencing, we assumed a  
384 50 cycle sequencing kit is sufficient for all methods.

385 **Data accession**

386 The raw and analysed data files can be obtained in GEO under accession number  
387 GSE75790.

388

389 **Competing interests**

390 The authors declare that they have no competing interests.

391

392 **Author's contributions**

393 CZ and WE conceived the experiments. CZ prepared scRNA-seq libraries and analyzed the  
394 data. SP helped in data processing and power simulations. BV estimated ERCC capture  
395 efficiencies. MS performed cell culture of mESC. WE and HL supervised the experimental  
396 work and IH provided guidance in data analysis. CZ and WE wrote the manuscript. All  
397 authors read and approved the final manuscript.

398

399 **Acknowledgements**

400 We thank Christopher Mulholland for assistance with FACS sorting, Dominik Alterauge for  
401 help establishing the Drop-seq method and Stefan Krebs and Helmut Blum from the  
402 LAFUGA platform for sequencing. This work was supported by the LMU excellence  
403 initiative and the SFB1243.

## References

1. Kim, H. D., Shay, T., O'Shea, E. K. & Regev, A. Transcriptional regulatory circuits: predicting numbers from alphabets. *Science* **325**, 429–432 (2009).
2. ENCODE Project Consortium. An integrated encyclopedia of DNA elements in the human genome. *Nature* **489**, 57–74 (2012).
3. Sandberg, R. Entering the era of single-cell transcriptomics in biology and medicine. *Nat. Methods* **11**, 22–24 (2014).
4. Kolodziejczyk, A. A., Kim, J. K., Svensson, V., Marioni, J. C. & Teichmann, S. A. The technology and biology of single-cell RNA sequencing. *Mol. Cell* **58**, 610–620 (2015).

5. Eberwine, J., Sul, J.-Y., Bartfai, T. & Kim, J. The promise of single-cell sequencing. *Nat. Methods* **11**, 25–27 (2014).
6. Saliba, A.-E., Westermann, A. J., Gorski, S. A. & Vogel, J. Single-cell RNA-seq: advances and future challenges. *Nucleic Acids Res.* **42**, 8845–8860 (2014).
7. Wu, A. R. *et al.* Quantitative assessment of single-cell RNA-sequencing methods. *Nat. Methods* **11**, 41–46 (2014).
8. Fu, G. K., Hu, J., Wang, P.-H. & Fodor, S. P. A. Counting individual DNA molecules by the stochastic attachment of diverse labels. *Proc. Natl. Acad. Sci. U. S. A.* **108**, 9026–9031 (2011).
9. Hashimshony, T., Wagner, F., Sher, N. & Yanai, I. CEL-Seq: single-cell RNA-Seq by multiplexed linear amplification. *Cell Rep.* **2**, 666–673 (2012).
10. Kivioja, T. *et al.* Counting absolute numbers of molecules using unique molecular identifiers. *Nat. Methods* **9**, 72–74 (2012).
11. Islam, S. *et al.* Quantitative single-cell RNA-seq with unique molecular identifiers. *Nat. Methods* **11**, 163–166 (2014).
12. Grün, D., Kester, L. & van Oudenaarden, A. Validation of noise models for single-cell transcriptomics. *Nat. Methods* **11**, 637–640 (2014).
13. Soumillon *et al.* Characterization of directed differentiation by high-throughput single-cell RNA-Seq. *bioRxiv* (2014). doi:10.1101/003236
14. Jaitin, D. A. *et al.* Massively parallel single-cell RNA-seq for marker-free decomposition of tissues into cell types. *Science* **343**, 776–779 (2014).
15. Macosko, E. Z. *et al.* Highly Parallel Genome-wide Expression Profiling of Individual Cells Using Nanoliter Droplets. *Cell* **161**, 1202–1214 (2015).
16. Jiang, L. *et al.* Synthetic spike-in standards for RNA-seq experiments. *Genome Res.* **21**, 1543–1551 (2011).
17. Marinov, G. K. *et al.* From single-cell to cell-pool transcriptomes: Stochasticity in gene

- expression and RNA splicing. *Genome Res.* **24**, 496–510 (2014).
18. Kim, J. K., Kolodziejczyk, A. A., Illicic, T., Teichmann, S. A. & Marioni, J. C. Characterizing noise structure in single-cell RNA-seq distinguishes genuine from technical stochastic allelic expression. *Nat. Commun.* **6**, 8687 (2015).
  19. Buettner, F. *et al.* Computational analysis of cell-to-cell heterogeneity in single-cell RNA-sequencing data reveals hidden subpopulations of cells. *Nat. Biotechnol.* **33**, 155–160 (2015).
  20. Wu, H., Wang, C. & Wu, Z. PROPER: comprehensive power evaluation for differential expression using RNA-seq. *Bioinformatics* **31**, 233–241 (2015).
  21. Love, M. I., Huber, W. & Anders, S. Moderated estimation of fold change and dispersion for RNA-seq data with DESeq2. *Genome Biol.* **15**, 550 (2014).
  22. Parekh, S., Ziegenhain, C., Vieth, B., Enard, W. & Hellmann, I. The impact of amplification on differential expression analyses by RNA-seq. *bioRxiv* 035493 (2015).  
doi:10.1101/035493
  23. Dobin, A. *et al.* STAR: ultrafast universal RNA-seq aligner. *Bioinformatics* **29**, 15–21 (2013).
  24. Liao, Y., Smyth, G. K. & Shi, W. The Subread aligner: fast, accurate and scalable read mapping by seed-and-vote. *Nucleic Acids Res.* **41**, e108 (2013).



## Tables

| Method       | Power            | n <sub>cells</sub><br>(per group) | Library cost (€)   | Sequencing<br>cost (€) | Experiment<br>cost (€) |
|--------------|------------------|-----------------------------------|--------------------|------------------------|------------------------|
| CEL-seq      | 0.8 <sup>a</sup> | 52                                | ~820 <sup>b</sup>  | ~180 <sup>c</sup>      | ~1000                  |
| Drop-seq     | 0.8 <sup>a</sup> | 170                               | ~30 <sup>b</sup>   | ~840 <sup>c</sup>      | ~870                   |
| SCRB-seq     | 0.8 <sup>a</sup> | 112                               | ~450 <sup>b</sup>  | ~320 <sup>c</sup>      | ~870                   |
| Smart-seq/C1 | 0.5 <sup>a</sup> | 129                               | ~6560 <sup>b</sup> | ~290 <sup>c</sup>      | ~6850                  |

**Table 1** | Cost efficiency extrapolation for single-cell RNA-seq experiments.

<sup>a</sup> Based on simulations (Fig. 4b) for detection of  $\log_2(\text{fold-change}) = 0.25$

<sup>b</sup> assuming per cell library preparation costs of 8€, 0.1€, 2€, 25€ respectively

<sup>c</sup> Taking into account the mapping and exon assignment rates found in this study (see Fig. 2a), as well as the fraction of reads that falls into undesired cell barcodes in early-barcoding methods.

## Figures

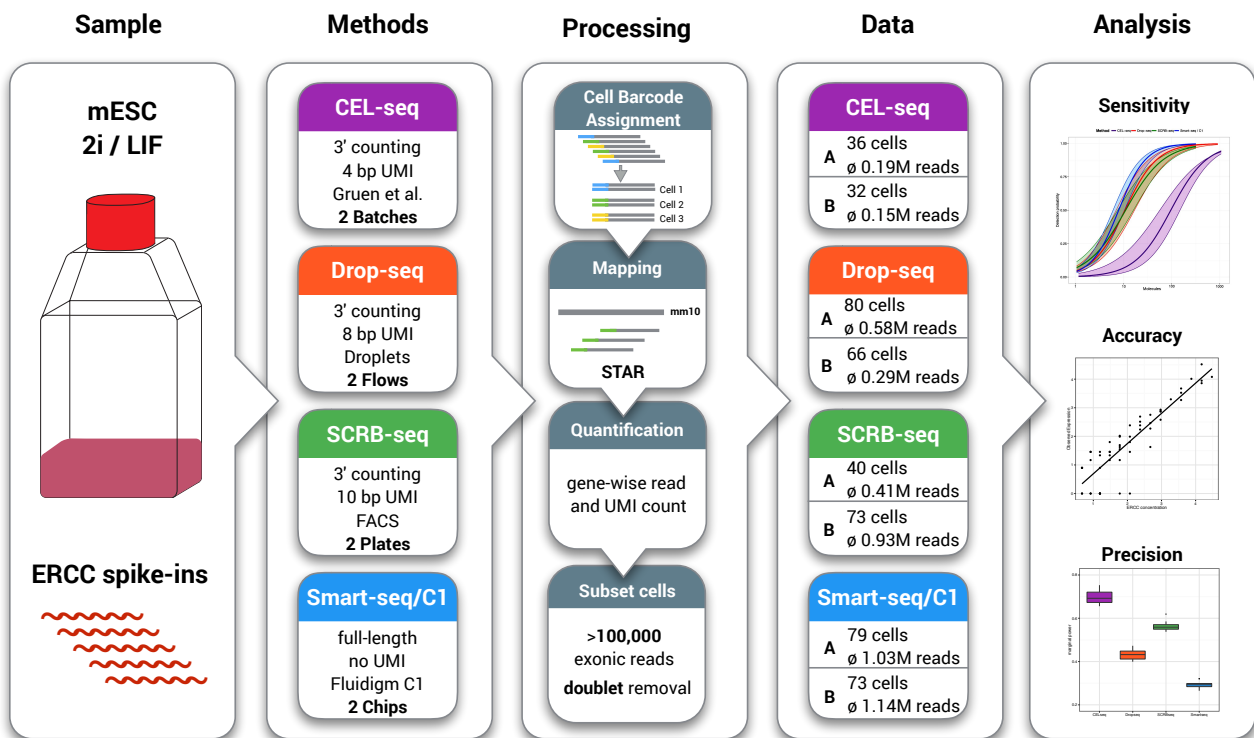

**Figure 1** | Schematic of the experimental and computational pipeline. Mouse embryonic stem cells cultured in 2i/LIF and ERCC spike-in RNA were used to prepare single-cell RNA-seq libraries. The four methods differ by the presence and length of a unique molecular identifier sequence (UMI) allowing to identify reads generated during cDNA amplification. Data processing and subsetting of cells was done comparatively for all methods. Final cell numbers per method and replicate are shown with their mean sequencing depth. Colors represent the compared scRNA-seq methods: purple - CEL-seq, orange - Drop-seq, green SCR-seq, blue - Smart-seq and are used throughout this study.

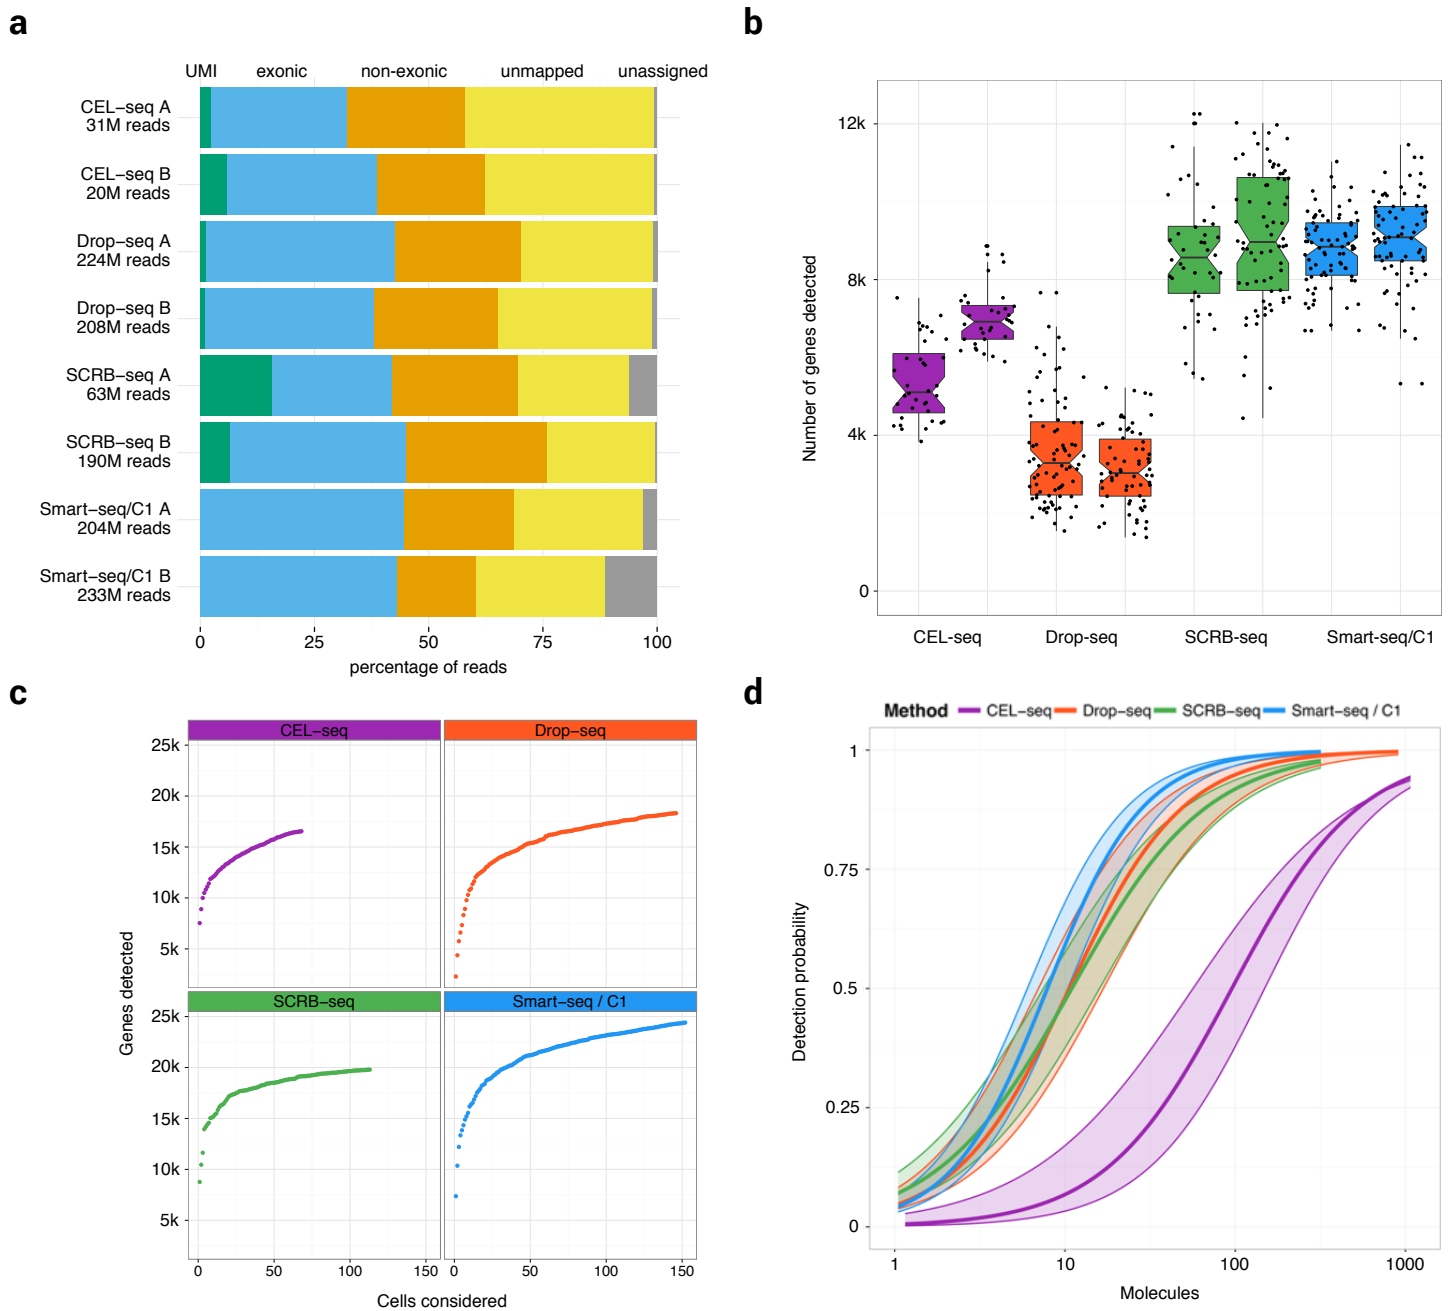

**Figure 2** | Sensitivity of scRNA-seq methods.

(a) Percentage of the total reads that can not be assigned to a cellular barcode (grey), can not be mapped to the mouse genome (yellow), are mapped to regions outside exons (orange), inside exons (blue) and carry a unique UMI (green). (b) Number of genes with at least one read in all cells with more than 100,000 total reads in total. Each dot represents a cell and each boxplot represents the median, first and third quartile per replicate and method. (c) Cumulative number of genes detected as more cells are added. (d) Sensitivity per method estimated as the probability to detect ERCC transcripts dependent on their copy number per cell. The 95% confidence interval of an estimate is displayed as shaded area.

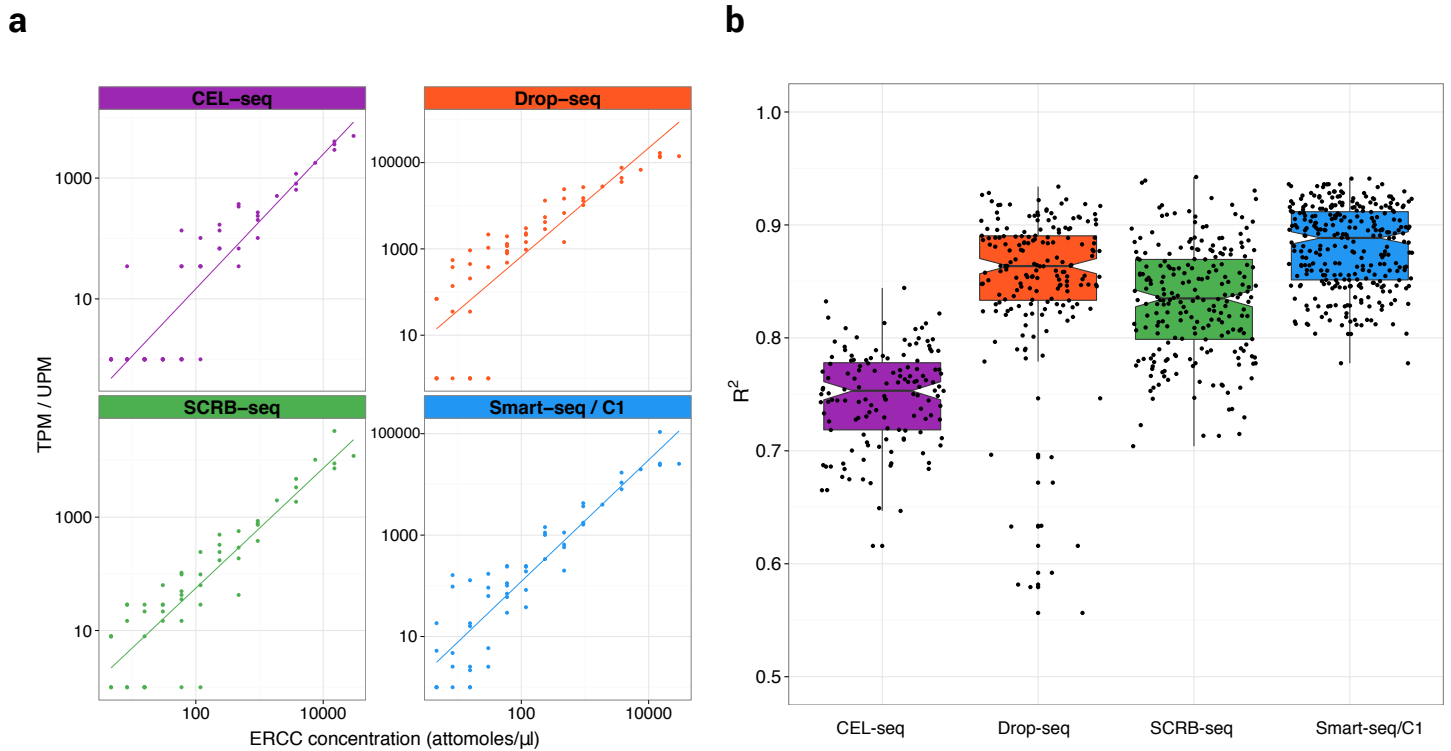

**Figure 3** | Accuracy of scRNA-seq methods. **(a)** Representative correlations of single-cell / single-bead (Drop-seq) expression values for ERCC spike-ins and their annotated molarity. Expression is measured as transcripts per million reads (TPM, Smart-seq/C1) or UMIs per million reads (UPM). **(b)** Distribution of correlation coefficients (Pearson) across methods. Each dot represents a cell/bead and each boxplot represents the median, first and third quartile.

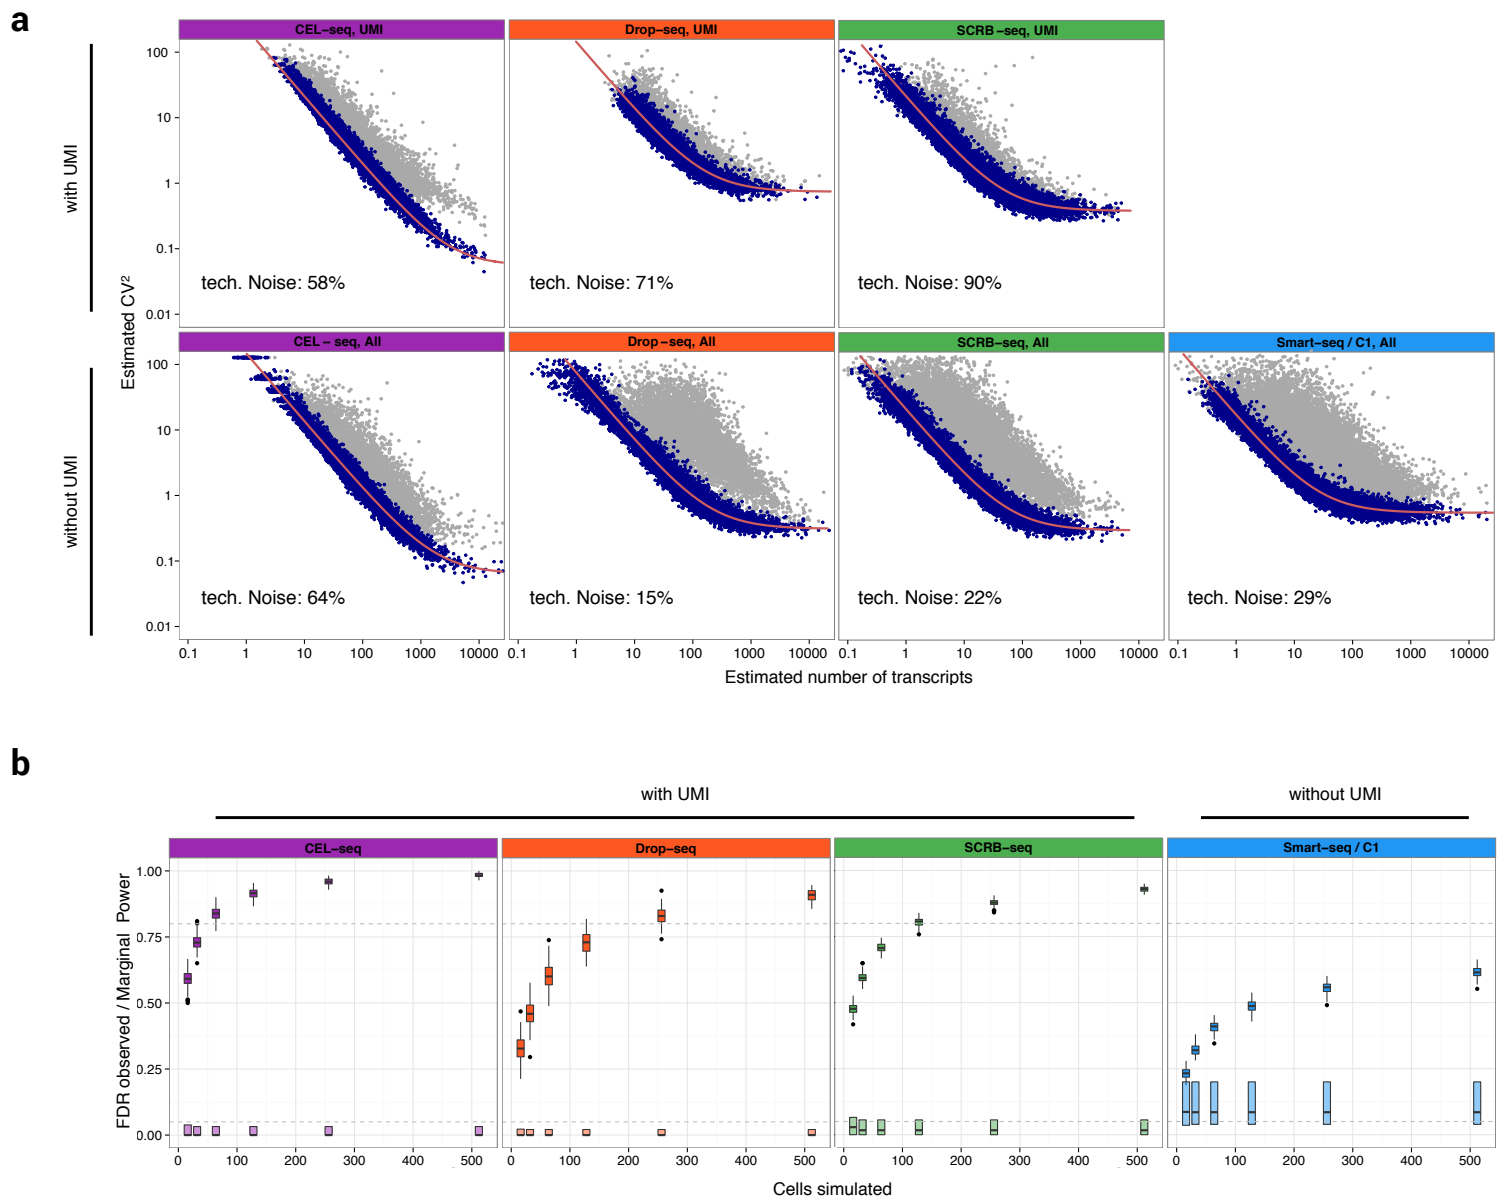

**Figure 4** | Variance decomposition and power analysis. **(a)** Variance decomposition according to Kim et al. 2015. Technical and biological noise factors were estimated from complete read counts and UMI counts (where available) and further used to simulate mean / variance distributions per scRNA-seq method. Shown are simulated genes with technical and technical plus biological factor. Genes with technical factor only are shown in blue, with technical and biological factor in grey and the technical noise fit for ERCC spike-ins is shown in red. **(b)** Power simulations using empirical mean / dispersion relationships. Boxplots represent the median, first and third quartile of 100 simulations. Power analysis of differentiation scenario with a small fixed effect size of 0.25 log<sub>2</sub> fold-change and variable sample size  $n=16$ ,  $n=32$ ,  $n=64$ ,  $n=128$ ,  $n=256$  and  $n=512$ . Shown are marginal power and observed FDR over 100 simulations with relevant cut-offs marked in dashed lines (marginal power = 0.8; FDR = 0.05).
